# Supplementary material
Source: Springer Nature journal article supplement (https://www.springermedizin.de/resource/supplementary/12876_2002_59_MOESM4_ESM.pdf/9438610)
Supplement: MOESM4 [file 9438610]

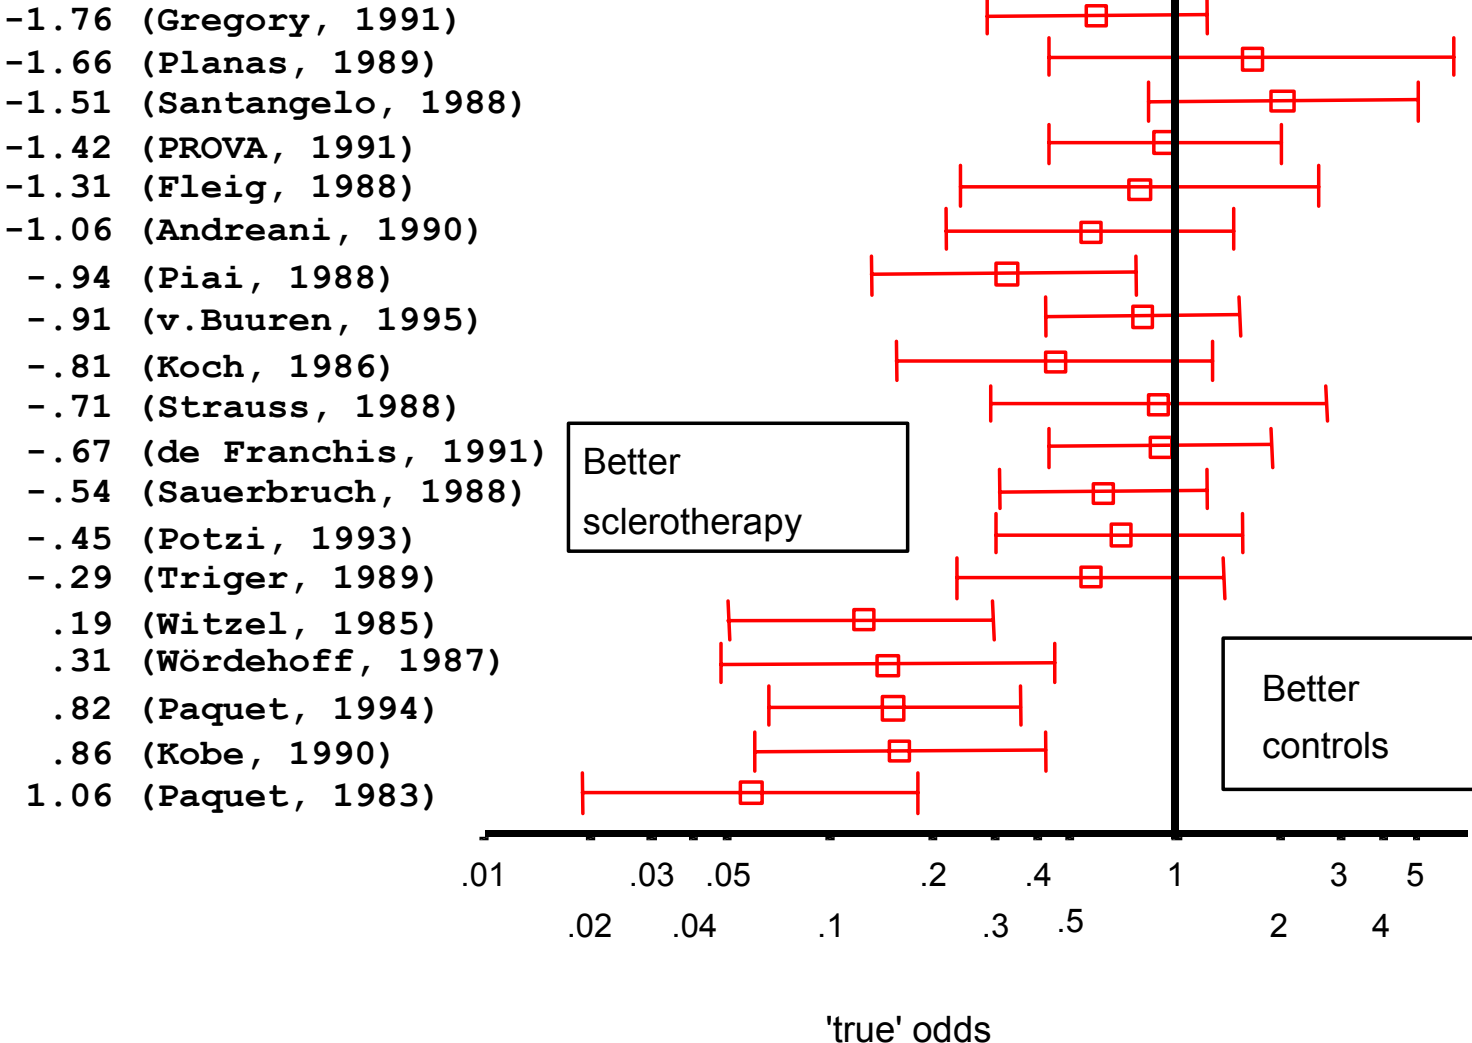

-1.76 (Gregory, 1991)  
 -1.66 (Planas, 1989)  
 -1.51 (Santangelo, 1988)  
 -1.42 (PROVA, 1991)  
 -1.31 (Fleig, 1988)  
 -1.06 (Andreani, 1990)  
 -.94 (Piai, 1988)  
 -.91 (v.Buuren, 1995)  
 -.81 (Koch, 1986)  
 -.71 (Strauss, 1988)  
 -.67 (de Franchis, 1991)  
 -.54 (Sauerbruch, 1988)  
 -.45 (Potzi, 1993)  
 -.29 (Triger, 1989)  
 .19 (Witzel, 1985)  
 .31 (Wördehoff, 1987)  
 .82 (Paquet, 1994)  
 .86 (Kobe, 1990)  
 1.06 (Paquet, 1983)

Better  
sclerotherapy

Better  
controls

'true' odds
